# Supplementary material for: Iron oxides in the cryoconite of glaciers on the Tibetan Plateau: abundance, speciation and implications
Source: Copernicus journal article supplement (doi:10.5194/tc-12-3177-2018), 2018-10-05
Supplement: Supplementary file 1 [file tc-12-3177-2018-supplement.pdf]

Supplement of The Cryosphere, 12, 3177–3186, 2018  
<https://doi.org/10.5194/tc-12-3177-2018-supplement>  
© Author(s) 2018. This work is distributed under  
the Creative Commons Attribution 4.0 License.

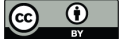

*Supplement of*

## **Iron oxides in the cryoconite of glaciers on the Tibetan Plateau: abundance, speciation and implications**

**Zhiyuan Cong et al.**

*Correspondence to:* Shichang Kang ([shichang.kang@lzb.ac.cn](mailto:shichang.kang@lzb.ac.cn))

The copyright of individual parts of the supplement might differ from the CC BY 4.0 License.

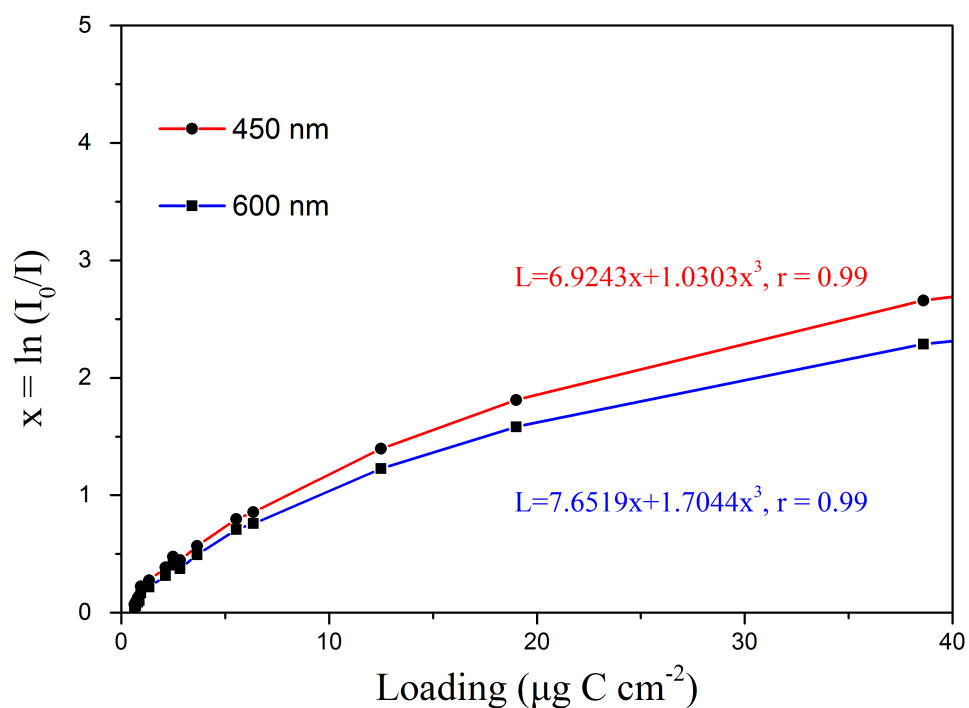

**Figure S1.** The calibration curve for 450 nm (red) and 600 nm (blue) against black carbon standards (fullerene soot). The solid curves were derived from best-fit of third-order polynomial between loading and attenuation, with the correlation coefficient ( $r$ ) of 0.99.
